# Supplementary material for: Two-Dimensional Titanium Dioxide–Surfactant Photoactive Supramolecular Networks: Synthesis, Properties, and Applications for the Conversion of Light Energy
Source: MDPI journal article supplement (doi:10.3390/ijms23074006), 2022-04-04
Supplement: s1 [file s1]

Supplementary Information

# Two-Dimensional Titanium Dioxide–Surfactant Photoactive Supramolecular Networks: Synthesis, Properties, and Applications for the Conversion of Light Energy

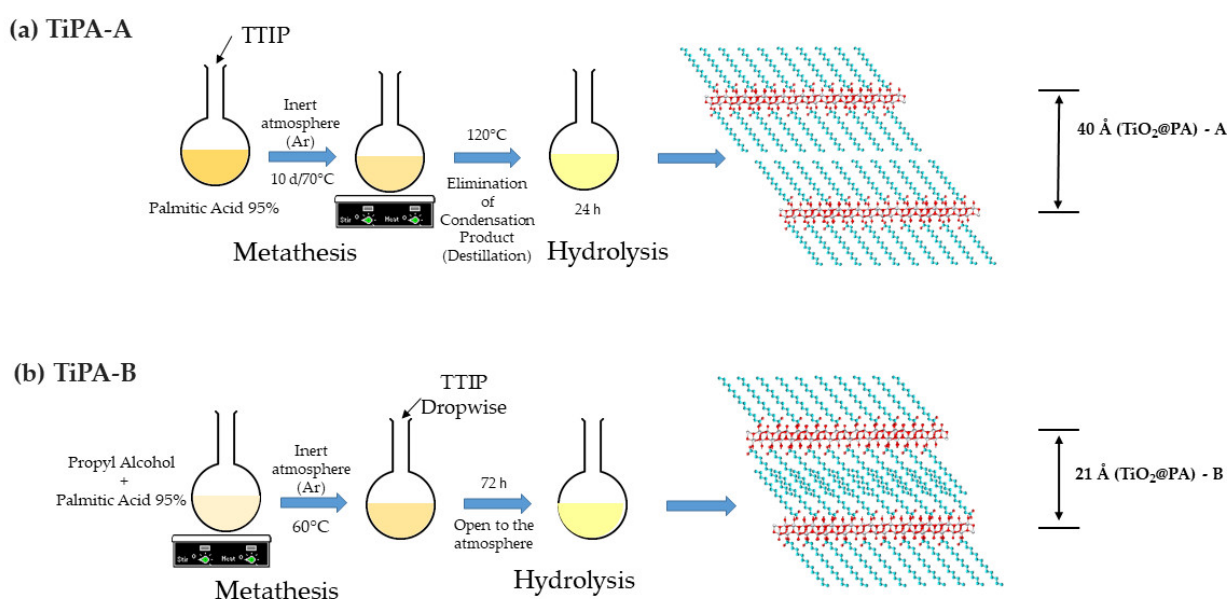

**Scheme S1.** Diagram of synthesis methods of TiO<sub>2</sub>@Surfactants nanocomposites. Sequential process (a) and Concurrent process (b).

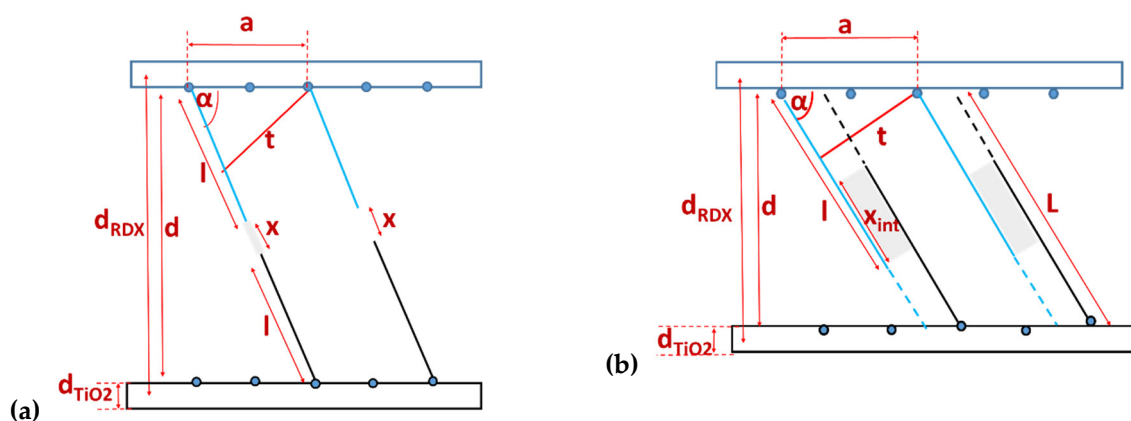

**Scheme S2.** Geometric model to describe the structure of commensurate TiO<sub>2</sub>@fatty acids. Sequential process (a) and Concurrent process (b).

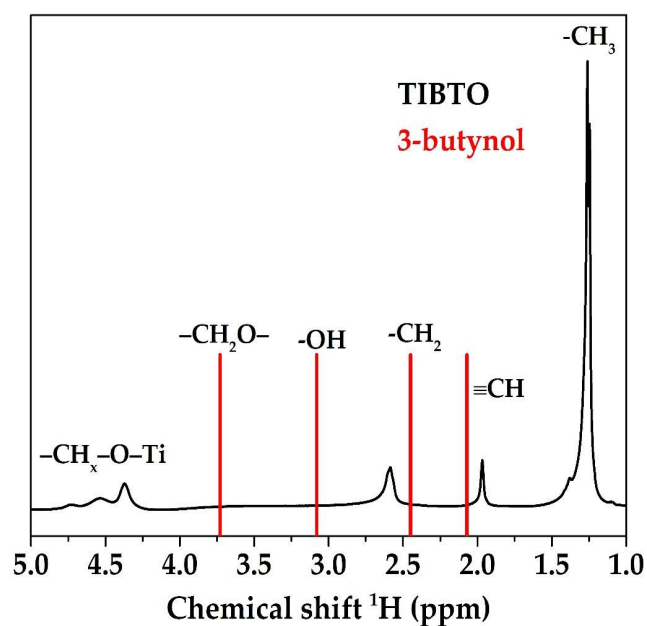

**Figure S1.**  $^1\text{H}$ -NMR spectrum of the intermediate molecular dimer  $[\text{Ti}(\text{TIP})_3(\text{BTO})(\text{OH})_2]_2\text{O}$  in  $\text{CDCl}_3$  solution at room temperature. Chemical shifts (ppm, relative to tetramethylsilane TMS). Red lines indicate the chemical changes of 3-butyn-1-ol.

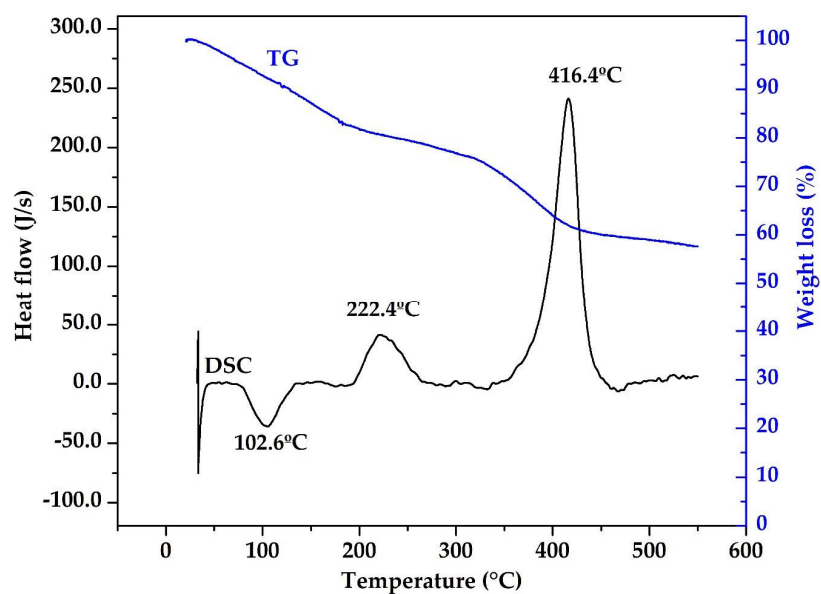

**Figure S2.** Thermal analysis of TiBTO. Left axis, DSC analysis; right axis, TG analysis.

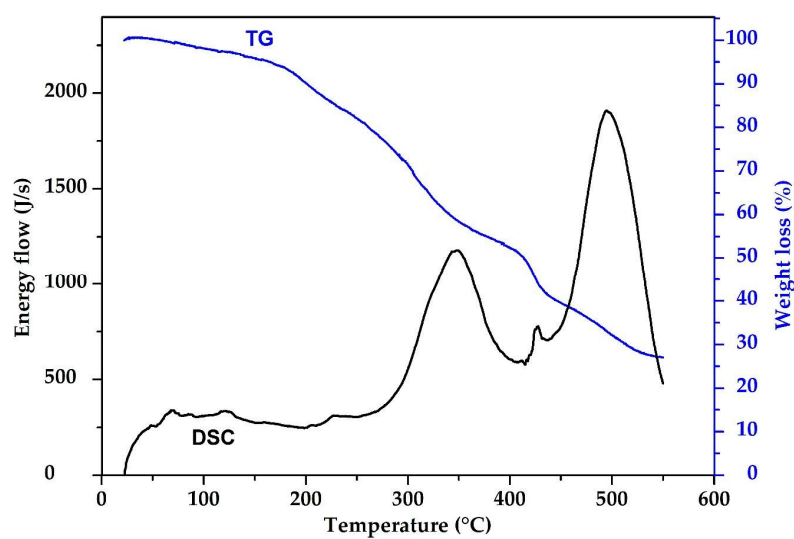

**Figure S3.** Thermal analysis of TiPA-A. Left axis, DSC analysis; right axis, TG analysis.

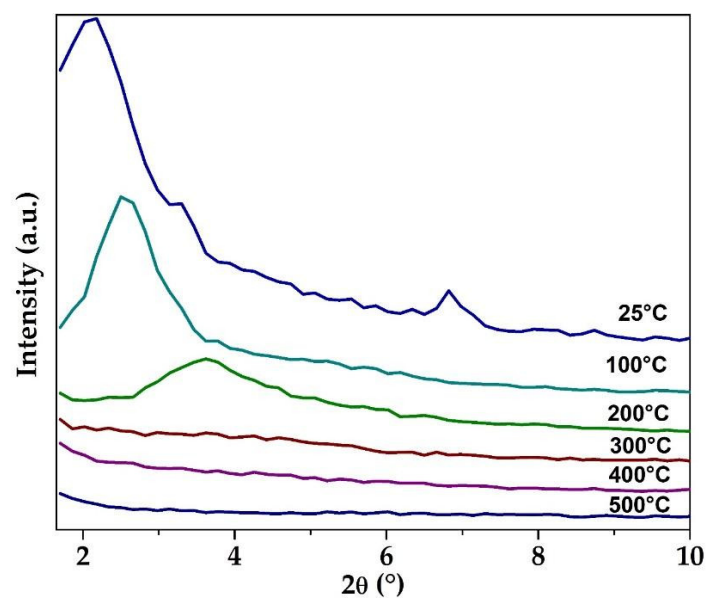

**Figure S4.** XRD patterns of TiPA-A samples heated in air at different temperatures.

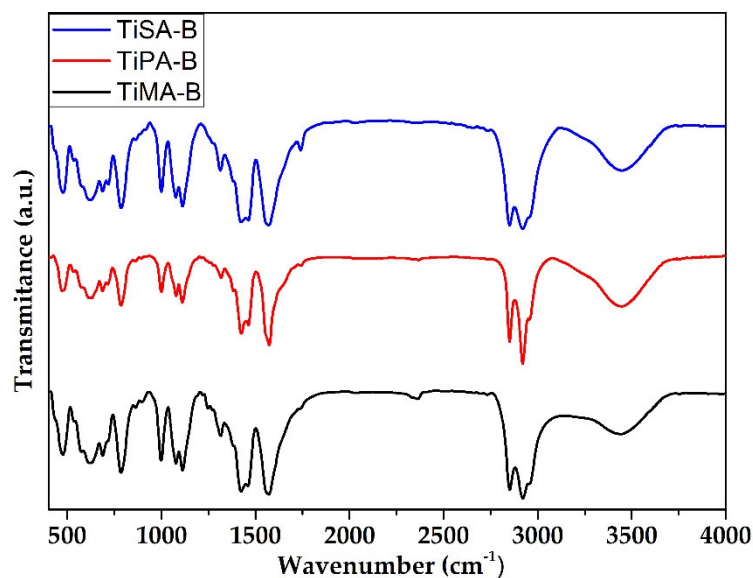

**Figure S5.** FTIR spectra of TiO<sub>2</sub>@fatty-acid nanocomposites prepared through the concurrent process. TiMA-B (a); TiPA-B (b); and TiSA (c).

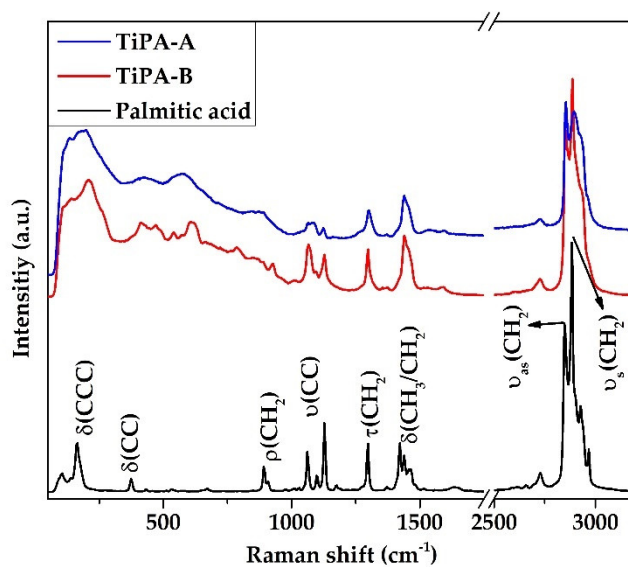

**Figure S6.** Raman scattering in the range of 1200 to 3200 cm<sup>-1</sup> for TiMA-A, TiMA-B and pristine myristic acid.

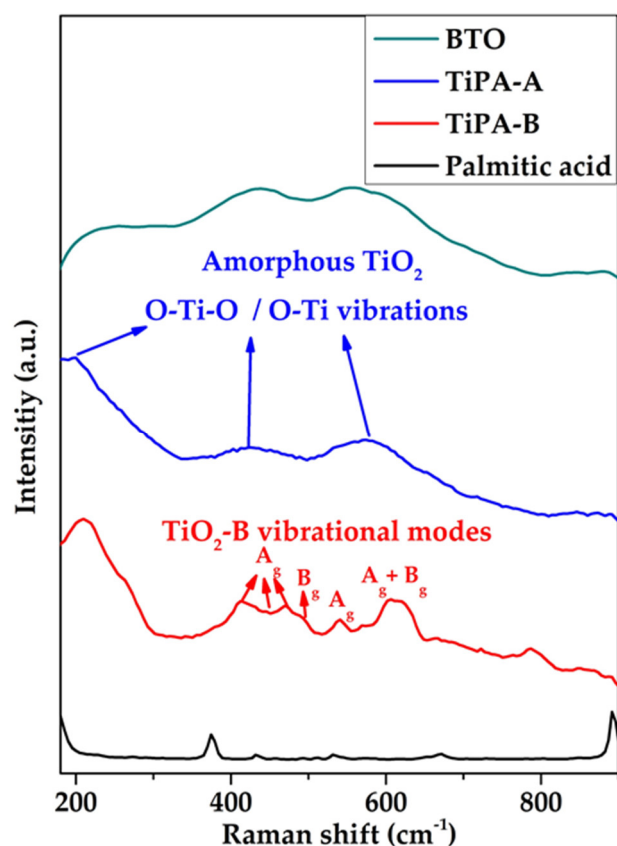

**Figure S7.** Raman scattering in the range of 0 to 950  $\text{cm}^{-1}$  for TiPA-A, TiPA-B, and TiBTO and palmitic acid samples.

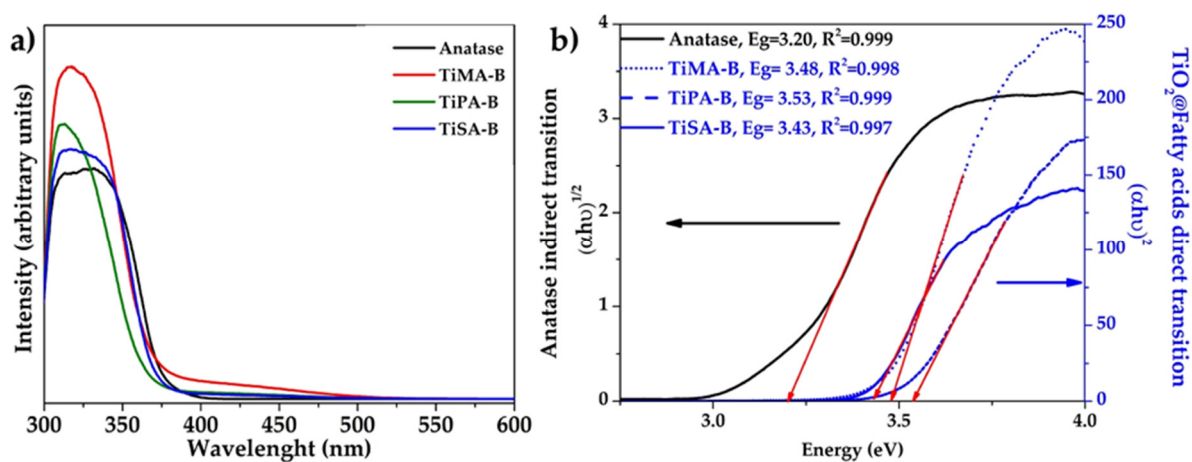

**Figure S8.** Absorbance spectra of TiFA-B semiconductor nanocomposites and of anatase (a); band gaps of TiFA-B semiconductor nanocomposites for a direct transition (right axis) compared to that of  $\text{TiO}_2$ -anatase for an indirect transition (left axis), calculated by the Tauc relationship. M (TiMA): 3.48 eV,  $R^2=0.998$ ; S (TiPA): 3.53 eV,  $R^2=0.999$ ; P(TiSA): 3.43 eV,  $R^2=0.997$  (b).

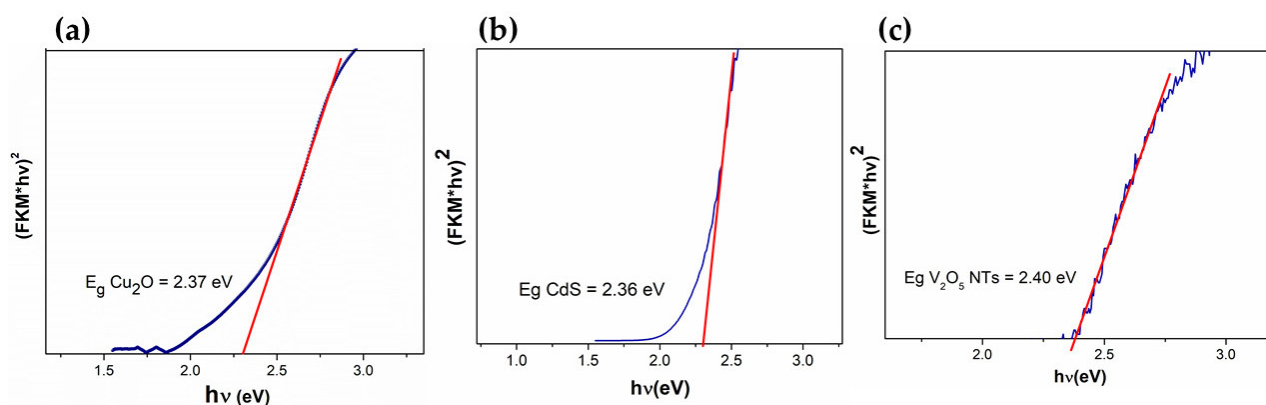

Figure S9. Tauc plots of Cu<sub>2</sub>O (a), CdS (b), and V<sub>2</sub>O<sub>5</sub> (c).

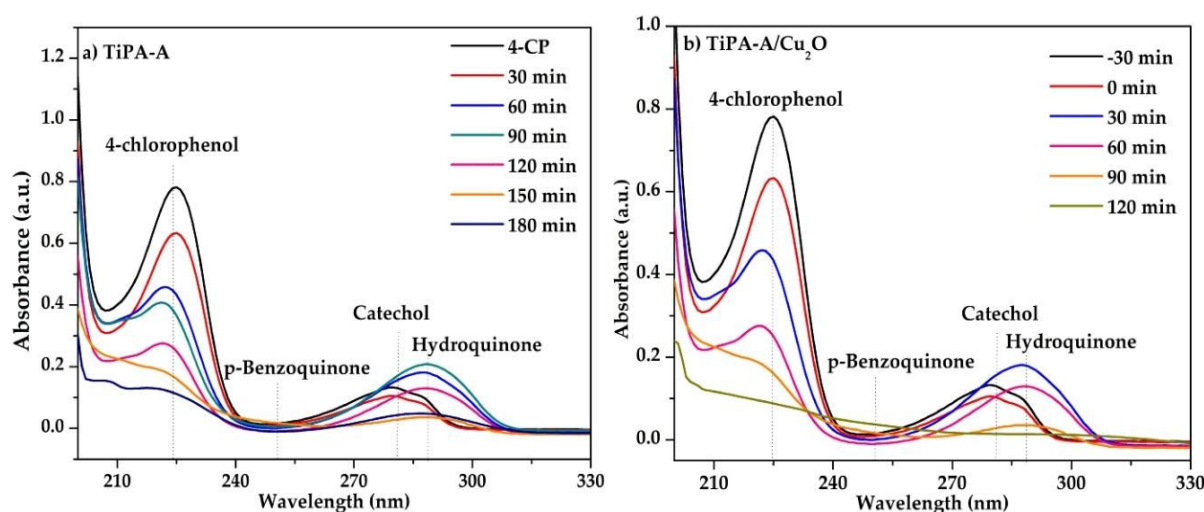

Figure S10. Simulated-solar light-driven degradation of 4-chlorophenol (4-CP) assisted by TiPA-A (a) and by composite TiPA-A/Cu<sub>2</sub>O (b).

Table S1. Chemical composition of the products obtained by the sequential process from the analysis of microelements and complemented with thermogravimetric analysis.

| Sample | Analysis Exp.(calculated) % |              |              | Empirical Formula                                                                                                                                                |
|--------|-----------------------------|--------------|--------------|------------------------------------------------------------------------------------------------------------------------------------------------------------------|
|        | C                           | H            | Ti           |                                                                                                                                                                  |
| TiBTO  | 30.4 (30.50)                | 4.00 (3.490) | 30.3 (30.44) | TiO <sub>2</sub> (C <sub>4</sub> H <sub>5</sub> )•0.25(TiO <sub>2</sub> H <sub>2</sub> O)                                                                        |
| TiPA-A | 49.8 (50.37)                | 10.2 (8.940) | 17.9 (17.59) | 0.7[TiO <sub>2</sub> (C <sub>16</sub> H <sub>35</sub> O)]•[HTiO <sub>2</sub> (C <sub>16</sub> H <sub>36</sub> O <sub>2</sub> ) <sub>2.3</sub> •H <sub>2</sub> O] |

Table S2. Chemical composition of the products obtained by the concurrent process from the analysis of microelements and complemented with thermogravimetric analysis.

| Sample | Analysis Exp.(calculated) % |               |               | Empirical Formula                                                                                                                                                        |
|--------|-----------------------------|---------------|---------------|--------------------------------------------------------------------------------------------------------------------------------------------------------------------------|
|        | C                           | H             | Ti            |                                                                                                                                                                          |
| TiMA-B | 60.81<br>(61.17)            | 10.37 (9.66)  | 12.67 (12.62) | Ti(C <sub>14</sub> H <sub>27</sub> O)•0.42(C <sub>14</sub> H <sub>28</sub> O <sub>2</sub> )•0.1[HTiO <sub>2</sub> (C <sub>14</sub> H <sub>27</sub> O)(H <sub>2</sub> O)] |
| TiPA-B | 60.87<br>(60.91)            | 10.62 (11.56) | 10.84 (10.85) | Ti(C <sub>16</sub> H <sub>35</sub> O)•0.4(C <sub>16</sub> H <sub>36</sub> O <sub>2</sub> )•0.4(H <sub>2</sub> O)                                                         |
| TiSA-B | 61.10<br>(61.00)            | 10.37 (11.19) | 12.67 (13.09) | Ti(C <sub>18</sub> H <sub>39</sub> O)•0.03(C <sub>18</sub> H <sub>40</sub> O <sub>2</sub> )•0.3(H <sub>2</sub> O)                                                        |
